# Supplementary material for: Constitutively active form of natriuretic peptide receptor 2 ameliorates experimental pulmonary arterial hypertension
Source: PubMed Central journal article supplement (PMC4934588; doi:10.1038/mtm.2016.44), 2016-07-06

Supplementary Figure S1

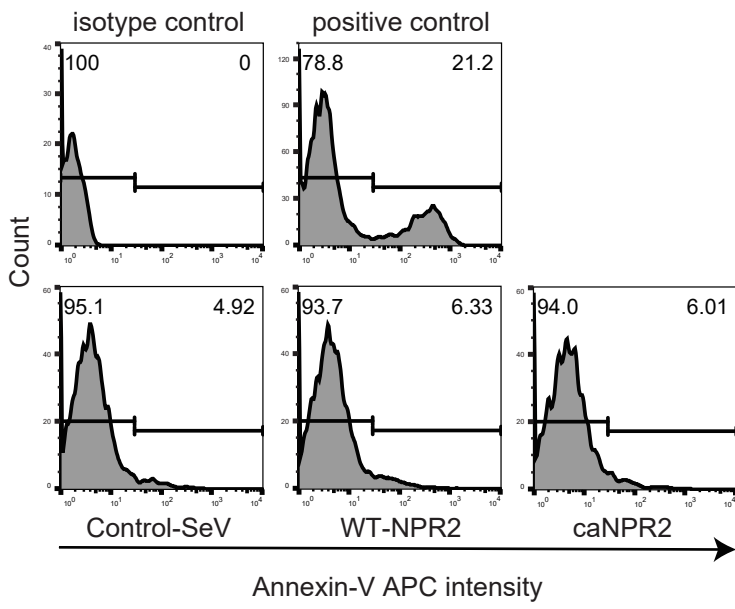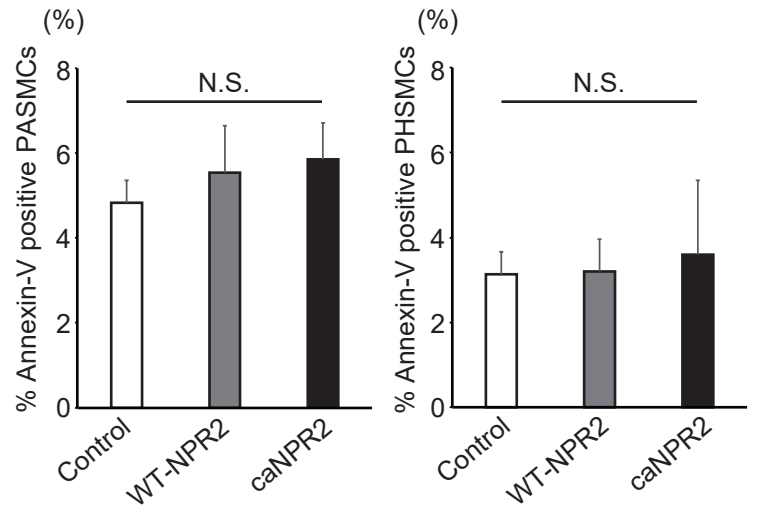

Supplement: mtm201644-s1.pdf [file mtm201644-s1.pdf]
